# Supplementary material for: Effect of E-Beam Irradiation on Thermal and Mechanical Properties of Ester Elastomers Containing Multifunctional Alcohols
Source: MDPI journal article supplement (doi:10.3390/polym12051043), 2020-05-02
Supplement: s1 [file s1]

# Effect of E-Beam Irradiation on Thermal and Mechanical Properties of Ester Elastomers Containing Multifunctional Alcohols

Marta Piątek-Hnat, Kuba Bomba, Jakub Pęksiński and Agnieszka Kozłowska,  
Jacek G. Sośnicki, Tomasz J. Idzik

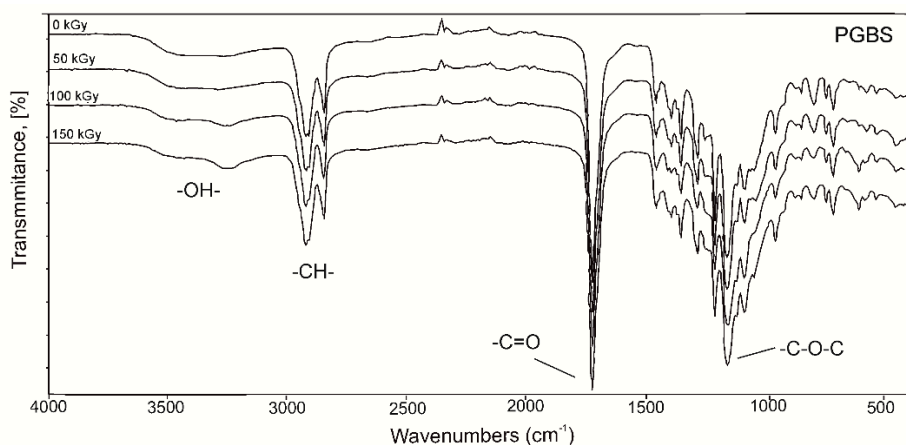

**Figure S1.** FTIR spectra of poly(glycerol sebacate-co-butylene sebacate) (PGBS) before and after irradiation.

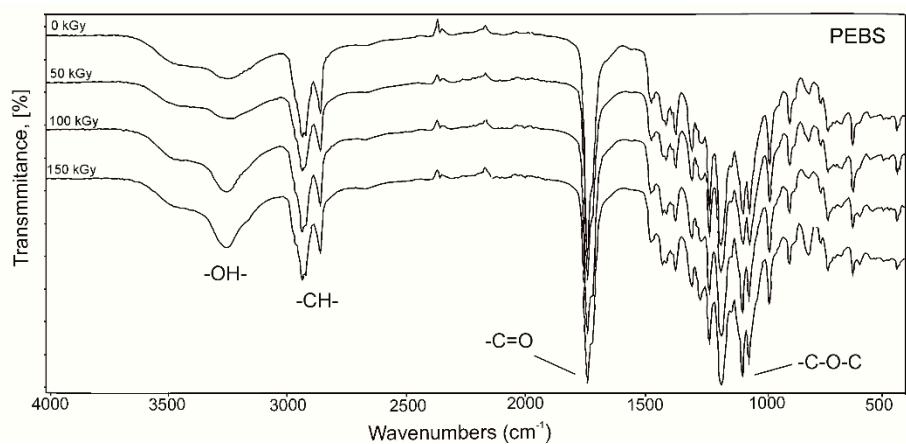

**Figure S2.** FTIR spectra of poly(erythrytol sebacate-co-butylene sebacate) (PEBS) before and after irradiation.

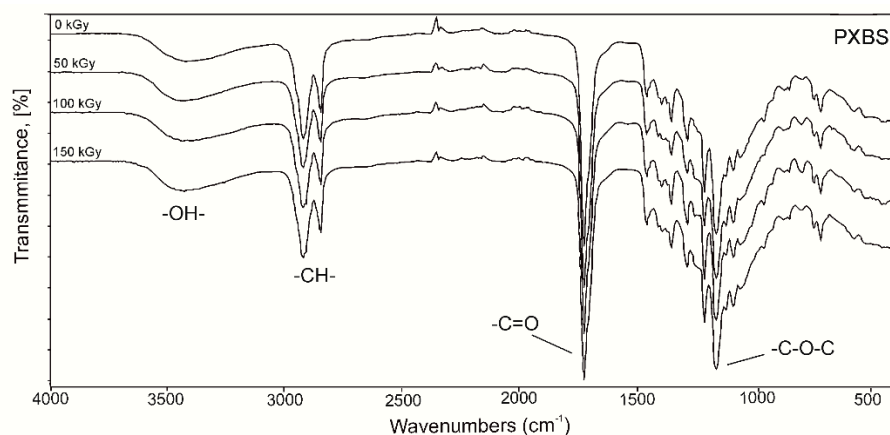

**Figure S3.** FTIR spectra of poly(xylitol sebacate-co-butylene sebacate) (PXBS) before and after irradiation.

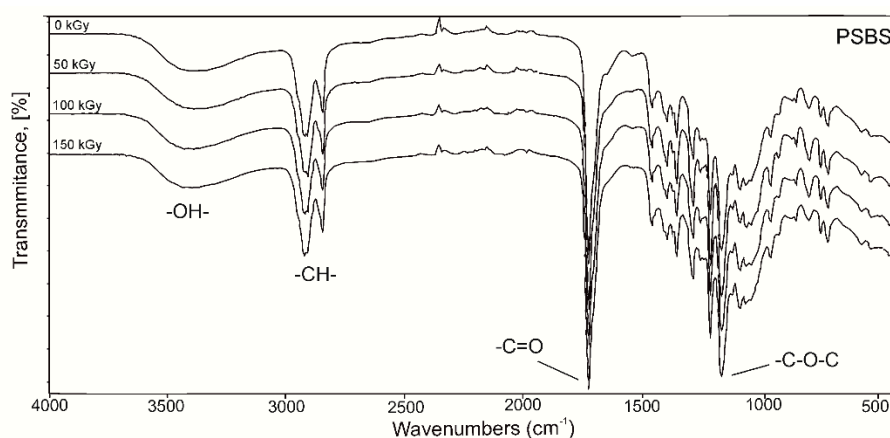

**Figure S4.** FTIR spectra of poly(sorbitol sebacate-co-butylene sebacate) (PSBS) before and after irradiation.

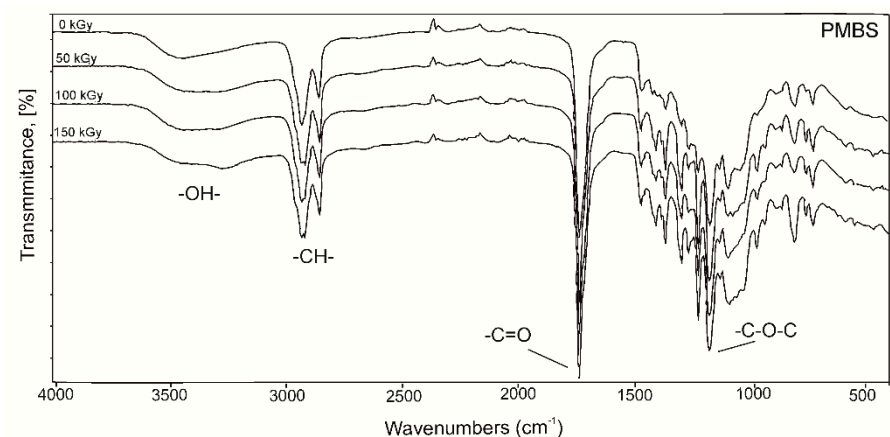

**Figure S5.** FTIR spectra of poly(mannitol sebacate-co-butylene sebacate) (PMBS) before and after irradiation.
